# Supplementary material for: Effect of Defects in Graphene/Cu Composites on the Density of States
Source: MDPI journal article supplement (doi:10.3390/ma16030962), 2023-01-20
Supplement: s1 [file s1]

## Supporting information for the readers

### (1) *The coordinates of Model 1*

C 1.2305 0.71042951 0  
C 0 1.42085901 0  
C 0 2.84329617 0  
C -1.2305 3.55372568 0  
C -1.2305 4.97616284 0  
C -2.461 5.68659235 0  
C -2.461 7.10902951 0  
C -3.6915 7.81945901 0  
C -3.6915 9.24189617 0  
C -4.922 9.95232568 0  
C -4.922 11.37476284 0  
C -6.1525 12.08519235 0  
C 3.6915 0.71042951 0  
C 2.461 1.42085901 0  
C 2.461 2.84329617 0  
C 1.2305 3.55372568 0  
C 1.2305 4.97616284 0  
C 0 5.68659235 0  
C 0 7.10902951 0  
C -1.2305 7.81945901 0  
C -1.2305 9.24189617 0  
C -2.461 9.95232568 0  
C -2.461 11.37476284 0  
C -3.6915 12.08519235 0  
C 6.1525 0.71042951 0  
C 4.922 1.42085901 0  
C 4.922 2.84329617 0  
C 3.6915 3.55372568 0  
C 3.6915 4.97616284 0  
C 2.461 5.68659235 0  
C 2.461 7.10902951 0  
C 1.2305 7.81945901 0  
C 1.2305 9.24189617 0  
C 0 9.95232568 0  
C 0 11.37476284 0  
C -1.2305 12.08519235 0  
C 8.6135 0.71042951 0

C 7.383 1.42085901 0  
 C 7.383 2.84329617 0  
 C 6.1525 3.55372568 0  
 C 6.1525 4.97616284 0  
 C 4.922 5.68659235 0  
 C 4.922 7.10902951 0  
 C 3.6915 7.81945901 0  
 C 3.6915 9.24189617 0  
 C 2.461 9.95232568 0  
 C 2.461 11.37476284 0  
 C 1.2305 12.08519235 0  
 C 11.0745 0.71042951 0  
 C 9.844 1.42085901 0  
 C 9.844 2.84329617 0  
 C 8.6135 3.55372568 0  
 C 8.6135 4.97616284 0  
 C 7.383 5.68659235 0  
 C 7.383 7.10902951 0  
 C 6.1525 7.81945901 0  
 C 6.1525 9.24189617 0  
 C 4.922 9.95232568 0  
 C 4.922 11.37476284 0  
 C 3.6915 12.08519235 0  
 C 13.5355 0.71042951 0  
 C 12.305 1.42085901 0  
 C 12.305 2.84329617 0  
 C 11.0745 3.55372568 0  
 C 11.0745 4.97616284 0  
 C 9.844 5.68659235 0  
 C 9.844 7.10902951 0  
 C 8.6135 7.81945901 0  
 C 8.6135 9.24189617 0  
 C 7.383 9.95232568 0  
 C 7.383 11.37476284 0  
 C 6.1525 12.08519235 0

(2) *The coordinates of Model 2*

Cu 0 4.26494426 4.5  
 Cu 2.461 4.26494426 4.5  
 Cu 1.2305 2.13207759 4.5  
 Cu 3.6915 2.13207759 4.5  
 Cu 6.1525 2.13207759 4.5

Cu 4.922 4.26494426 4.5  
 Cu -3.6915 10.66354426 4.5  
 Cu -1.2305 10.66354426 4.5  
 Cu -2.461 8.53067759 4.5  
 Cu 0 8.53067759 4.5  
 Cu 2.461 8.53067759 4.5  
 Cu 1.2305 10.66354426 4.5  
 Cu 7.383 4.26494426 4.5  
 Cu 9.844 4.26494426 4.5  
 Cu 8.6135 2.13207759 4.5  
 Cu 11.0745 2.13207759 4.5  
 Cu 3.6915 10.66354426 4.5  
 Cu 6.1525 10.66354426 4.5  
 Cu 4.922 8.53067759 4.5  
 Cu 7.383 8.53067759 4.5  
 Cu -1.2305 6.39781092 4.5  
 Cu 1.2305 6.39781092 4.5  
 Cu 3.6912 6.39781092 4.5  
 Cu 6.1522 6.39781092 4.5  
 Cu 8.6132 6.39781092 4.5

(3) *The coordinates of Model 3*

C 1.2305 0.71042951 3  
 C 0 1.42085901 3  
 C 0 2.84329617 3  
 C -1.2305 3.55372568 3  
 C -1.2305 4.97616284 3  
 C -2.461 5.68659235 3  
 C 3.6915 0.71042951 3  
 C 2.461 1.42085901 3  
 C 2.461 2.84329617 3  
 C 1.2305 3.55372568 3  
 C 1.2305 4.97616284 3  
 C 0 5.68659235 3  
 C 6.1525 0.71042951 3  
 C 4.922 1.42085901 3  
 C 4.922 2.84329617 3  
 C 3.6915 3.55372568 3  
 C 3.6915 4.97616284 3  
 C 2.461 5.68659235 3  
 Cu 0 4.26494426 4.5  
 Cu 2.461 4.26494426 4.5

Cu 1.2305 2.13207759 4.5  
 Cu 3.6915 2.13207759 4.5  
 Cu 6.1525 2.13207759 4.5  
 Cu 4.922 4.26494426 4.5  
 C -2.461 7.10902951 3  
 C -3.6915 7.81945901 3  
 C -3.6915 9.24189617 3  
 C -4.922 9.95232568 3  
 C -4.922 11.37476284 3  
 C -6.1525 12.08519235 3  
 C 0 7.10902951 3  
 C -1.2305 7.81945901 3  
 C -1.2305 9.24189617 3  
 C -2.461 9.95232568 3  
 C -2.461 11.37476284 3  
 C -3.6915 12.08519235 3  
 C 2.461 7.10902951 3  
 C 1.2305 7.81945901 3  
 C 1.2305 9.24189617 3  
 C 0 9.95232568 3  
 C 0 11.37476284 3  
 C -1.2305 12.08519235 3  
 Cu -3.6915 10.66354426 4.5  
 Cu -1.2305 10.66354426 4.5  
 Cu -2.461 8.53067759 4.5  
 Cu 0 8.53067759 4.5  
 Cu 2.461 8.53067759 4.5  
 Cu 1.2305 10.66354426 4.5  
 C 8.6135 0.71042951 3  
 C 7.383 1.42085901 3  
 C 7.383 2.84329617 3  
 C 6.1525 3.55372568 3  
 C 6.1525 4.97616284 3  
 C 4.922 5.68659235 3  
 C 11.0745 0.71042951 3  
 C 9.844 1.42085901 3  
 C 9.844 2.84329617 3  
 C 8.6135 3.55372568 3  
 C 8.6135 4.97616284 3  
 C 7.383 5.68659235 3  
 C 13.5355 0.71042951 3

C 12.305 1.42085901 3  
 C 12.305 2.84329617 3  
 C 11.0745 3.55372568 3  
 C 11.0745 4.97616284 3  
 C 9.844 5.68659235 3  
 Cu 7.383 4.26494426 4.5  
 Cu 9.844 4.26494426 4.5  
 Cu 8.6135 2.13207759 4.5  
 Cu 11.0745 2.13207759 4.5  
 C 4.922 7.10902951 3  
 C 3.6915 7.81945901 3  
 C 3.6915 9.24189617 3  
 C 2.461 9.95232568 3  
 C 2.461 11.37476284 3  
 C 1.2305 12.08519235 3  
 C 7.383 7.10902951 3  
 C 6.1525 7.81945901 3  
 C 6.1525 9.24189617 3  
 C 4.922 9.95232568 3  
 C 4.922 11.37476284 3  
 C 3.6915 12.08519235 3  
 C 9.844 7.10902951 3  
 C 8.6135 7.81945901 3  
 C 8.6135 9.24189617 3  
 C 7.383 9.95232568 3  
 C 7.383 11.37476284 3  
 C 6.1525 12.08519235 3  
 Cu 3.6915 10.66354426 4.5  
 Cu 6.1525 10.66354426 4.5  
 Cu 4.922 8.53067759 4.5  
 Cu 7.383 8.53067759 4.5  
 Cu -1.2305 6.39781092 4.5  
 Cu 1.2305 6.39781092 4.5  
 Cu 3.6912 6.39781092 4.5  
 Cu 6.1522 6.39781092 4.5  
 Cu 8.6132 6.39781092 4.5

*(4) The coordinates of Model 4*

C 1.2305 0.71042951 0  
 C 0 1.42085901 0  
 C 0 2.84329617 0  
 C -1.2305 3.55372568 0

C -1.2305 4.97616284 0  
 C -2.461 5.68659235 0  
 C 3.6915 0.71042951 0  
 C 2.461 1.42085901 0  
 C 2.461 2.84329617 0  
 C 1.2305 3.55372568 0  
 C 1.2305 4.97616284 0  
 C 0 5.68659235 0  
 C 6.1525 0.71042951 0  
 C 4.922 1.42085901 0  
 C 4.922 2.84329617 0  
 C 3.6915 3.55372568 0  
 C 3.6915 4.97616284 0  
 C 2.461 5.68659235 0  
 Cu 0 4.26494426 1.5  
 Cu 2.461 4.26494426 1.5  
 Cu 1.2305 2.13207759 1.5  
 Cu 3.6915 2.13207759 1.5  
 C 1.2305 0.71042951 3  
 C 0 1.42085901 3  
 C 0 2.84329617 3  
 C -1.2305 3.55372568 3  
 C -1.2305 4.97616284 3  
 C -2.461 5.68659235 3  
 C 3.6915 0.71042951 3  
 C 2.461 1.42085901 3  
 C 2.461 2.84329617 3  
 C 1.2305 3.55372568 3  
 C 1.2305 4.97616284 3  
 C 0 5.68659235 3  
 C 6.1525 0.71042951 3  
 C 4.922 1.42085901 3  
 C 4.922 2.84329617 3  
 C 3.6915 3.55372568 3  
 C 3.6915 4.97616284 3  
 C 2.461 5.68659235 3  
 Cu 0 4.26494426 4.5  
 Cu 2.461 4.26494426 4.5  
 Cu 1.2305 2.13207759 4.5  
 Cu 3.6915 2.13207759 4.5  
 Cu 6.1525 2.13207759 4.5

Cu 4.922 4.26494426 4.5  
 Cu 6.1525 2.13207759 1.5  
 Cu 4.922 4.26494426 1.5  
 C -2.461 7.10902951 0  
 C -3.6915 7.81945901 0  
 C -3.6915 9.24189617 0  
 C -4.922 9.95232568 0  
 C -4.922 11.37476284 0  
 C -6.1525 12.08519235 0  
 C 0 7.10902951 0  
 C -1.2305 7.81945901 0  
 C -1.2305 9.24189617 0  
 C -2.461 9.95232568 0  
 C -2.461 11.37476284 0  
 C -3.6915 12.08519235 0  
 C 2.461 7.10902951 0  
 C 1.2305 7.81945901 0  
 C 1.2305 9.24189617 0  
 C 0 9.95232568 0  
 C 0 11.37476284 0  
 C -1.2305 12.08519235 0  
 Cu -3.6915 10.66354426 1.5  
 Cu -1.2305 10.66354426 1.5  
 Cu -2.461 8.53067759 1.5  
 Cu 0 8.53067759 1.5  
 C -2.461 7.10902951 3  
 C -3.6915 7.81945901 3  
 C -3.6915 9.24189617 3  
 C -4.922 9.95232568 3  
 C -4.922 11.37476284 3  
 C -6.1525 12.08519235 3  
 C 0 7.10902951 3  
 C -1.2305 7.81945901 3  
 C -1.2305 9.24189617 3  
 C -2.461 9.95232568 3  
 C -2.461 11.37476284 3  
 C -3.6915 12.08519235 3  
 C 2.461 7.10902951 3  
 C 1.2305 7.81945901 3  
 C 1.2305 9.24189617 3  
 C 0 9.95232568 3

C 0 11.37476284 3  
C -1.2305 12.08519235 3  
Cu -3.6915 10.66354426 4.5  
Cu -1.2305 10.66354426 4.5  
Cu -2.461 8.53067759 4.5  
Cu 0 8.53067759 4.5  
Cu 2.461 8.53067759 4.5  
Cu 1.2305 10.66354426 4.5  
Cu 2.461 8.53067759 1.5  
Cu 1.2305 10.66354426 1.5  
C 8.6135 0.71042951 0  
C 7.383 1.42085901 0  
C 7.383 2.84329617 0  
C 6.1525 3.55372568 0  
C 6.1525 4.97616284 0  
C 4.922 5.68659235 0  
C 11.0745 0.71042951 0  
C 9.844 1.42085901 0  
C 9.844 2.84329617 0  
C 8.6135 3.55372568 0  
C 8.6135 4.97616284 0  
C 7.383 5.68659235 0  
C 13.5355 0.71042951 0  
C 12.305 1.42085901 0  
C 12.305 2.84329617 0  
C 11.0745 3.55372568 0  
C 11.0745 4.97616284 0  
C 9.844 5.68659235 0  
Cu 7.383 4.26494426 1.5  
Cu 9.844 4.26494426 1.5  
Cu 8.6135 2.13207759 1.5  
Cu 11.0745 2.13207759 1.5  
C 8.6135 0.71042951 3  
C 7.383 1.42085901 3  
C 7.383 2.84329617 3  
C 6.1525 3.55372568 3  
C 6.1525 4.97616284 3  
C 4.922 5.68659235 3  
C 11.0745 0.71042951 3  
C 9.844 1.42085901 3  
C 9.844 2.84329617 3



C 8.6135 3.55372568 3  
C 8.6135 4.97616284 3  
C 7.383 5.68659235 3  
C 13.5355 0.71042951 3  
C 12.305 1.42085901 3  
C 12.305 2.84329617 3  
C 11.0745 3.55372568 3  
C 11.0745 4.97616284 3  
C 9.844 5.68659235 3  
Cu 7.383 4.26494426 4.5  
Cu 9.844 4.26494426 4.5  
Cu 8.6135 2.13207759 4.5  
Cu 11.0745 2.13207759 4.5  
C 4.922 7.10902951 0  
C 3.6915 7.81945901 0  
C 3.6915 9.24189617 0  
C 2.461 9.95232568 0  
C 2.461 11.37476284 0  
C 1.2305 12.08519235 0  
C 7.383 7.10902951 0  
C 6.1525 7.81945901 0  
C 6.1525 9.24189617 0  
C 4.922 9.95232568 0  
C 4.922 11.37476284 0  
C 3.6915 12.08519235 0  
C 9.844 7.10902951 0  
C 8.6135 7.81945901 0  
C 8.6135 9.24189617 0  
C 7.383 9.95232568 0  
C 7.383 11.37476284 0  
C 6.1525 12.08519235 0  
Cu 3.6915 10.66354426 1.5  
Cu 6.1525 10.66354426 1.5  
Cu 4.922 8.53067759 1.5  
Cu 7.383 8.53067759 1.5  
C 4.922 7.10902951 3  
C 3.6915 7.81945901 3  
C 3.6915 9.24189617 3  
C 2.461 9.95232568 3  
C 2.461 11.37476284 3  
C 1.2305 12.08519235 3

C 7.383 7.10902951 3  
 C 6.1525 7.81945901 3  
 C 6.1525 9.24189617 3  
 C 4.922 9.95232568 3  
 C 4.922 11.37476284 3  
 C 3.6915 12.08519235 3  
 C 9.844 7.10902951 3  
 C 8.6135 7.81945901 3  
 C 8.6135 9.24189617 3  
 C 7.383 9.95232568 3  
 C 7.383 11.37476284 3  
 C 6.1525 12.08519235 3  
 Cu 3.6915 10.66354426 4.5  
 Cu 6.1525 10.66354426 4.5  
 Cu 4.922 8.53067759 4.5  
 Cu 7.383 8.53067759 4.5  
 Cu -1.2305 6.39781092 4.5  
 Cu 1.2305 6.39781092 4.5  
 Cu 3.6912 6.39781092 4.5  
 Cu 6.1522 6.39781092 4.5  
 Cu 8.6132 6.39781092 4.5  
 Cu -1.2305 6.39781092 1.5  
 Cu 1.2305 6.39781092 1.5  
 Cu 3.6912 6.39781092 1.5  
 Cu 6.1522 6.39781092 1.5  
 Cu 8.6132 6.39781092 1.5  
 (5) *The coordinates of Model 5*  
 C 1.2305 0.71042951 0  
 C 0 1.42085901 0  
 C 0 2.84329617 0  
 C -1.2305 3.55372568 0  
 C -1.2305 4.97616284 0  
 C -2.461 5.68659235 0  
 C 3.6915 0.71042951 0  
 C 2.461 1.42085901 0  
 C 2.461 2.84329617 0  
 C 1.2305 3.55372568 0  
 C 1.2305 4.97616284 0  
 C 0 5.68659235 0  
 C 6.1525 0.71042951 0  
 C 4.922 1.42085901 0

C 4.922 2.84329617 0  
C 3.6915 3.55372568 0  
C 3.6915 4.97616284 0  
C 2.461 5.68659235 0  
Cu 0 4.26494426 1.5  
Cu 2.461 4.26494426 1.5  
Cu 1.2305 2.13207759 1.5  
Cu 3.6915 2.13207759 1.5  
C 1.2305 0.71042951 3  
C 0 1.42085901 3  
C 0 2.84329617 3  
C -1.2305 3.55372568 3  
C -1.2305 4.97616284 3  
C -2.461 5.68659235 3  
C 3.6915 0.71042951 3  
C 2.461 1.42085901 3  
C 2.461 2.84329617 3  
C 1.2305 3.55372568 3  
C 1.2305 4.97616284 3  
C 0 5.68659235 3  
C 6.1525 0.71042951 3  
C 4.922 1.42085901 3  
C 4.922 2.84329617 3  
C 3.6915 3.55372568 3  
C 3.6915 4.97616284 3  
C 2.461 5.68659235 3  
Cu 0 4.26494426 4.5  
Cu 2.461 4.26494426 4.5  
Cu 1.2305 2.13207759 4.5  
Cu 3.6915 2.13207759 4.5  
Cu 6.1525 2.13207759 4.5  
Cu 4.922 4.26494426 4.5  
Cu 6.1525 2.13207759 1.5  
Cu 4.922 4.26494426 1.5  
C -2.461 7.10902951 0  
C -3.6915 7.81945901 0  
C -3.6915 9.24189617 0  
C -4.922 9.95232568 0  
C -4.922 11.37476284 0  
C -6.1525 12.08519235 0  
C 0 7.10902951 0

C -1.2305 7.81945901 0  
 C -1.2305 9.24189617 0  
 C -2.461 9.95232568 0  
 C -2.461 11.37476284 0  
 C -3.6915 12.08519235 0  
 C 2.461 7.10902951 0  
 C 1.2305 7.81945901 0  
 C 1.2305 9.24189617 0  
 C 0 9.95232568 0  
 C 0 11.37476284 0  
 C -1.2305 12.08519235 0  
 Cu -3.6915 10.66354426 1.5  
 Cu -1.2305 10.66354426 1.5  
 Cu -2.461 8.53067759 1.5  
 Cu 0 8.53067759 1.5  
 C -2.461 7.10902951 3  
 C -3.6915 7.81945901 3  
 C -3.6915 9.24189617 3  
 C -4.922 9.95232568 3  
 C -4.922 11.37476284 3  
 C -6.1525 12.08519235 3  
 C 0 7.10902951 3  
 C -1.2305 7.81945901 3  
 C -1.2305 9.24189617 3  
 C -2.461 9.95232568 3  
 C -2.461 11.37476284 3  
 C -3.6915 12.08519235 3  
 C 2.461 7.10902951 3  
 C 1.2305 7.81945901 3  
 C 1.2305 9.24189617 3  
 C 0 9.95232568 3  
 C 0 11.37476284 3  
 C -1.2305 12.08519235 3  
 Cu -3.6915 10.66354426 4.5  
 Cu -1.2305 10.66354426 4.5  
 Cu -2.461 8.53067759 4.5  
 Cu 0 8.53067759 4.5  
 Cu 2.461 8.53067759 4.5  
 Cu 1.2305 10.66354426 4.5  
 Cu 2.461 8.53067759 1.5  
 Cu 1.2305 10.66354426 1.5

C 8.6135 0.71042951 0  
 C 7.383 1.42085901 0  
 C 7.383 2.84329617 0  
 C 6.1525 3.55372568 0  
 C 6.1525 4.97616284 0  
 C 4.922 5.68659235 0  
 C 11.0745 0.71042951 0  
 C 9.844 1.42085901 0  
 C 9.844 2.84329617 0  
 C 8.6135 3.55372568 0  
 C 8.6135 4.97616284 0  
 C 7.383 5.68659235 0  
 C 13.5355 0.71042951 0  
 C 12.305 1.42085901 0  
 C 12.305 2.84329617 0  
 C 11.0745 3.55372568 0  
 C 11.0745 4.97616284 0  
 C 9.844 5.68659235 0  
 Cu 7.383 4.26494426 1.5  
 Cu 9.844 4.26494426 1.5  
 Cu 8.6135 2.13207759 1.5  
 Cu 11.0745 2.13207759 1.5  
 C 8.6135 0.71042951 3  
 C 7.383 1.42085901 3  
 C 7.383 2.84329617 3  
 C 6.1525 3.55372568 3  
 C 6.1525 4.97616284 3  
 C 4.922 5.68659235 3  
 C 11.0745 0.71042951 3  
 C 9.844 1.42085901 3  
 C 9.844 2.84329617 3  
 C 8.6135 3.55372568 3  
 C 8.6135 4.97616284 3  
 C 7.383 5.68659235 3  
 C 13.5355 0.71042951 3  
 C 12.305 1.42085901 3  
 C 12.305 2.84329617 3  
 C 11.0745 3.55372568 3  
 C 11.0745 4.97616284 3  
 C 9.844 5.68659235 3  
 Cu 7.383 4.26494426 4.5

Cu 9.844 4.26494426 4.5  
Cu 8.6135 2.13207759 4.5  
Cu 11.0745 2.13207759 4.5  
C 4.922 7.10902951 0  
C 3.6915 7.81945901 0  
C 3.6915 9.24189617 0  
C 2.461 9.95232568 0  
C 2.461 11.37476284 0  
C 1.2305 12.08519235 0  
C 7.383 7.10902951 0  
C 6.1525 7.81945901 0  
C 6.1525 9.24189617 0  
C 4.922 9.95232568 0  
C 4.922 11.37476284 0  
C 3.6915 12.08519235 0  
C 9.844 7.10902951 0  
C 8.6135 7.81945901 0  
C 8.6135 9.24189617 0  
C 7.383 9.95232568 0  
C 7.383 11.37476284 0  
C 6.1525 12.08519235 0  
Cu 3.6915 10.66354426 1.5  
Cu 6.1525 10.66354426 1.5  
Cu 4.922 8.53067759 1.5  
Cu 7.383 8.53067759 1.5  
C 4.922 7.10902951 3  
C 3.6915 7.81945901 3  
C 3.6915 9.24189617 3  
C 2.461 9.95232568 3  
C 2.461 11.37476284 3  
C 1.2305 12.08519235 3  
C 7.383 7.10902951 3  
C 6.1525 7.81945901 3  
C 6.1525 9.24189617 3  
C 4.922 9.95232568 3  
C 4.922 11.37476284 3  
C 3.6915 12.08519235 3  
C 9.844 7.10902951 3  
C 8.6135 7.81945901 3  
C 8.6135 9.24189617 3  
C 7.383 9.95232568 3

C 7.383 11.37476284 3  
 C 6.1525 12.08519235 3  
 Cu 3.6915 10.66354426 4.5  
 Cu 6.1525 10.66354426 4.5  
 Cu 4.922 8.53067759 4.5  
 Cu 7.383 8.53067759 4.5  
 Cu -1.2305 6.39781092 4.5  
 Cu 1.2305 6.39781092 4.5  
 Cu 3.6912 6.39781092 4.5  
 Cu 6.1522 6.39781092 4.5  
 Cu 8.6132 6.39781092 4.5  
 Cu -1.2305 6.39781092 1.5  
 Cu 1.2305 6.39781092 1.5  
 Cu 3.6912 6.39781092 1.5  
 Cu 6.1522 6.39781092 1.5  
 Cu 8.6132 6.39781092 1.5

*(6) The coordinates of Model 6*

C 1.2305 0.71042951 0  
 C 0 1.42085901 0  
 C 0 2.84329617 0  
 C -1.2305 3.55372568 0  
 C -1.2305 4.97616284 0  
 C -2.461 5.68659235 0  
 C 3.6915 0.71042951 0  
 C 2.461 1.42085901 0  
 C 2.461 2.84329617 0  
 C 1.2305 3.55372568 0  
 C 1.2305 4.97616284 0  
 C 0 5.68659235 0  
 C 6.1525 0.71042951 0  
 C 4.922 1.42085901 0  
 C 4.922 2.84329617 0  
 C 3.6915 3.55372568 0  
 Cu 0 4.26494426 1.5  
 Cu 2.461 4.26494426 1.5  
 Cu 1.2305 2.13207759 1.5  
 Cu 3.6915 2.13207759 1.5  
 C 1.2305 0.71042951 3  
 C 0 1.42085901 3  
 C 0 2.84329617 3  
 C -1.2305 3.55372568 3

C -1.2305 4.97616284 3  
 C -2.461 5.68659235 3  
 C 3.6915 0.71042951 3  
 C 2.461 1.42085901 3  
 C 2.461 2.84329617 3  
 C 1.2305 3.55372568 3  
 C 1.2305 4.97616284 3  
 C 0 5.68659235 3  
 C 6.1525 0.71042951 3  
 C 4.922 1.42085901 3  
 C 4.922 2.84329617 3  
 C 3.6915 3.55372568 3  
 C 3.6915 4.97616284 3  
 C 2.461 5.68659235 3  
 Cu 0 4.26494426 4.5  
 Cu 2.461 4.26494426 4.5  
 Cu 1.2305 2.13207759 4.5  
 Cu 3.6915 2.13207759 4.5  
 Cu 6.1525 2.13207759 4.5  
 Cu 4.922 4.26494426 4.5  
 Cu 6.1525 2.13207759 1.5  
 Cu 4.922 4.26494426 1.5  
 C -2.461 7.10902951 0  
 C -3.6915 7.81945901 0  
 C -3.6915 9.24189617 0  
 C -4.922 9.95232568 0  
 C -4.922 11.37476284 0  
 C -6.1525 12.08519235 0  
 C 0 7.10902951 0  
 C -1.2305 7.81945901 0  
 C -1.2305 9.24189617 0  
 C -2.461 9.95232568 0  
 C -2.461 11.37476284 0  
 C -3.6915 12.08519235 0  
 C 1.2305 7.81945901 0  
 C 1.2305 9.24189617 0  
 C 0 9.95232568 0  
 C 0 11.37476284 0  
 C -1.2305 12.08519235 0  
 Cu -3.6915 10.66354426 1.5  
 Cu -1.2305 10.66354426 1.5



Cu -2.461 8.53067759 1.5  
 Cu 0 8.53067759 1.5  
 C -2.461 7.10902951 3  
 C -3.6915 7.81945901 3  
 C -3.6915 9.24189617 3  
 C -4.922 9.95232568 3  
 C -4.922 11.37476284 3  
 C -6.1525 12.08519235 3  
 C 0 7.10902951 3  
 C -1.2305 7.81945901 3  
 C -1.2305 9.24189617 3  
 C -2.461 9.95232568 3  
 C -2.461 11.37476284 3  
 C -3.6915 12.08519235 3  
 C 2.461 7.10902951 3  
 C 1.2305 7.81945901 3  
 C 1.2305 9.24189617 3  
 C 0 9.95232568 3  
 C 0 11.37476284 3  
 C -1.2305 12.08519235 3  
 Cu -3.6915 10.66354426 4.5  
 Cu -1.2305 10.66354426 4.5  
 Cu -2.461 8.53067759 4.5  
 Cu 0 8.53067759 4.5  
 Cu 2.461 8.53067759 4.5  
 Cu 1.2305 10.66354426 4.5  
 Cu 2.461 8.53067759 1.5  
 Cu 1.2305 10.66354426 1.5  
 C 8.6135 0.71042951 0  
 C 7.383 1.42085901 0  
 C 7.383 2.84329617 0  
 C 6.1525 3.55372568 0  
 C 6.1525 4.97616284 0  
 C 11.0745 0.71042951 0  
 C 9.844 1.42085901 0  
 C 9.844 2.84329617 0  
 C 8.6135 3.55372568 0  
 C 8.6135 4.97616284 0  
 C 7.383 5.68659235 0  
 C 13.5355 0.71042951 0  
 C 12.305 1.42085901 0

C 12.305 2.84329617 0  
C 11.0745 3.55372568 0  
C 11.0745 4.97616284 0  
C 9.844 5.68659235 0  
Cu 7.383 4.26494426 1.5  
Cu 9.844 4.26494426 1.5  
Cu 8.6135 2.13207759 1.5  
Cu 11.0745 2.13207759 1.5  
C 8.6135 0.71042951 3  
C 7.383 1.42085901 3  
C 7.383 2.84329617 3  
C 6.1525 3.55372568 3  
C 6.1525 4.97616284 3  
C 4.922 5.68659235 3  
C 11.0745 0.71042951 3  
C 9.844 1.42085901 3  
C 9.844 2.84329617 3  
C 8.6135 3.55372568 3  
C 8.6135 4.97616284 3  
C 7.383 5.68659235 3  
C 13.5355 0.71042951 3  
C 12.305 1.42085901 3  
C 12.305 2.84329617 3  
C 11.0745 3.55372568 3  
C 11.0745 4.97616284 3  
C 9.844 5.68659235 3  
Cu 7.383 4.26494426 4.5  
Cu 9.844 4.26494426 4.5  
Cu 8.6135 2.13207759 4.5  
Cu 11.0745 2.13207759 4.5  
C 3.6915 9.24189617 0  
C 2.461 9.95232568 0  
C 2.461 11.37476284 0  
C 1.2305 12.08519235 0  
C 7.383 7.10902951 0  
C 6.1525 7.81945901 0  
C 6.1525 9.24189617 0  
C 4.922 9.95232568 0  
C 4.922 11.37476284 0  
C 3.6915 12.08519235 0  
C 9.844 7.10902951 0

C 8.6135 7.81945901 0  
C 8.6135 9.24189617 0  
C 7.383 9.95232568 0  
C 7.383 11.37476284 0  
C 6.1525 12.08519235 0  
Cu 3.6915 10.66354426 1.5  
Cu 6.1525 10.66354426 1.5  
Cu 4.922 8.53067759 1.5  
Cu 7.383 8.53067759 1.5  
C 4.922 7.10902951 3  
C 3.6915 7.81945901 3  
C 3.6915 9.24189617 3  
C 2.461 9.95232568 3  
C 2.461 11.37476284 3  
C 1.2305 12.08519235 3  
C 7.383 7.10902951 3  
C 6.1525 7.81945901 3  
C 6.1525 9.24189617 3  
C 4.922 9.95232568 3  
C 4.922 11.37476284 3  
C 3.6915 12.08519235 3  
C 9.844 7.10902951 3  
C 8.6135 7.81945901 3  
C 8.6135 9.24189617 3  
C 7.383 9.95232568 3  
C 7.383 11.37476284 3  
C 6.1525 12.08519235 3  
Cu 3.6915 10.66354426 4.5  
Cu 6.1525 10.66354426 4.5  
Cu 4.922 8.53067759 4.5  
Cu 7.383 8.53067759 4.5  
Cu -1.2305 6.39781092 4.5  
Cu 1.2305 6.39781092 4.5  
Cu 3.6912 6.39781092 4.5  
Cu 6.1522 6.39781092 4.5  
Cu 8.6132 6.39781092 4.5  
Cu -1.2305 6.39781092 1.5  
Cu 1.2305 6.39781092 1.5  
Cu 3.6912 6.39781092 1.5  
Cu 6.1522 6.39781092 1.5  
Cu 8.6132 6.39781092 1.5

(7) *The coordinates of Model 7*

C 1.2305 0.71042951 0  
C 0 1.42085901 0  
C 0 2.84329617 0  
C -1.2305 3.55372568 0  
C -1.2305 4.97616284 0  
C -2.461 5.68659235 0  
C 3.6915 0.71042951 0  
C 2.461 1.42085901 0  
C 2.461 2.84329617 0  
C 1.2305 3.55372568 0  
C 1.2305 4.97616284 0  
C 0 5.68659235 0  
C 6.1525 0.71042951 0  
C 4.922 1.42085901 0  
C 4.922 2.84329617 0  
C 3.6915 3.55372568 0  
C 3.6915 4.97616284 0  
C 2.461 5.68659235 0  
Cu 0 4.26494426 1.5  
Cu 2.461 4.26494426 1.5  
Cu 1.2305 2.13207759 1.5  
Cu 3.6915 2.13207759 1.5  
C 1.2305 0.71042951 3  
C 0 1.42085901 3  
C 0 2.84329617 3  
C -1.2305 3.55372568 3  
C -1.2305 4.97616284 3  
C -2.461 5.68659235 3  
C 3.6915 0.71042951 3  
C 2.461 1.42085901 3  
C 2.461 2.84329617 3  
C 1.2305 3.55372568 3  
C 1.2305 4.97616284 3  
C 0 5.68659235 3  
C 6.1525 0.71042951 3  
C 4.922 1.42085901 3  
C 4.922 2.84329617 3  
C 3.6915 3.55372568 3  
Cu 0 4.26494426 4.5  
Cu 2.461 4.26494426 4.5

Cu 1.2305 2.13207759 4.5  
 Cu 3.6915 2.13207759 4.5  
 Cu 6.1525 2.13207759 4.5  
 Cu 4.922 4.26494426 4.5  
 Cu 6.1525 2.13207759 1.5  
 Cu 4.922 4.26494426 1.5  
 C -2.461 7.10902951 0  
 C -3.6915 7.81945901 0  
 C -3.6915 9.24189617 0  
 C -4.922 9.95232568 0  
 C -4.922 11.37476284 0  
 C -6.1525 12.08519235 0  
 C 0 7.10902951 0  
 C -1.2305 7.81945901 0  
 C -1.2305 9.24189617 0  
 C -2.461 9.95232568 0  
 C -2.461 11.37476284 0  
 C -3.6915 12.08519235 0  
 C 2.461 7.10902951 0  
 C 1.2305 7.81945901 0  
 C 1.2305 9.24189617 0  
 C 0 9.95232568 0  
 C 0 11.37476284 0  
 C -1.2305 12.08519235 0  
 Cu -3.6915 10.66354426 1.5  
 Cu -1.2305 10.66354426 1.5  
 Cu -2.461 8.53067759 1.5  
 Cu 0 8.53067759 1.5  
 C -2.461 7.10902951 3  
 C -3.6915 7.81945901 3  
 C -3.6915 9.24189617 3  
 C -4.922 9.95232568 3  
 C -4.922 11.37476284 3  
 C -6.1525 12.08519235 3  
 C 0 7.10902951 3  
 C -1.2305 7.81945901 3  
 C -1.2305 9.24189617 3  
 C -2.461 9.95232568 3  
 C -2.461 11.37476284 3  
 C -3.6915 12.08519235 3  
 C 1.2305 7.81945901 3

C 1.2305 9.24189617 3  
C 0 9.95232568 3  
C 0 11.37476284 3  
C -1.2305 12.08519235 3  
Cu -3.6915 10.66354426 4.5  
Cu -1.2305 10.66354426 4.5  
Cu -2.461 8.53067759 4.5  
Cu 0 8.53067759 4.5  
Cu 2.461 8.53067759 4.5  
Cu 1.2305 10.66354426 4.5  
Cu 2.461 8.53067759 1.5  
Cu 1.2305 10.66354426 1.5  
C 8.6135 0.71042951 0  
C 7.383 1.42085901 0  
C 7.383 2.84329617 0  
C 6.1525 3.55372568 0  
C 6.1525 4.97616284 0  
C 4.922 5.68659235 0  
C 11.0745 0.71042951 0  
C 9.844 1.42085901 0  
C 9.844 2.84329617 0  
C 8.6135 3.55372568 0  
C 8.6135 4.97616284 0  
C 7.383 5.68659235 0  
C 13.5355 0.71042951 0  
C 12.305 1.42085901 0  
C 12.305 2.84329617 0  
C 11.0745 3.55372568 0  
C 11.0745 4.97616284 0  
C 9.844 5.68659235 0  
Cu 7.383 4.26494426 1.5  
Cu 9.844 4.26494426 1.5  
Cu 8.6135 2.13207759 1.5  
Cu 11.0745 2.13207759 1.5  
C 8.6135 0.71042951 3  
C 7.383 1.42085901 3  
C 7.383 2.84329617 3  
C 6.1525 3.55372568 3  
C 6.1525 4.97616284 3  
C 11.0745 0.71042951 3  
C 9.844 1.42085901 3

C 9.844 2.84329617 3  
 C 8.6135 3.55372568 3  
 C 8.6135 4.97616284 3  
 C 7.383 5.68659235 3  
 C 13.5355 0.71042951 3  
 C 12.305 1.42085901 3  
 C 12.305 2.84329617 3  
 C 11.0745 3.55372568 3  
 C 11.0745 4.97616284 3  
 C 9.844 5.68659235 3  
 Cu 7.383 4.26494426 4.5  
 Cu 9.844 4.26494426 4.5  
 Cu 8.6135 2.13207759 4.5  
 Cu 11.0745 2.13207759 4.5  
 C 4.922 7.10902951 0  
 C 3.6915 7.81945901 0  
 C 3.6915 9.24189617 0  
 C 2.461 9.95232568 0  
 C 2.461 11.37476284 0  
 C 1.2305 12.08519235 0  
 C 7.383 7.10902951 0  
 C 6.1525 7.81945901 0  
 C 6.1525 9.24189617 0  
 C 4.922 9.95232568 0  
 C 4.922 11.37476284 0  
 C 3.6915 12.08519235 0  
 C 9.844 7.10902951 0  
 C 8.6135 7.81945901 0  
 C 8.6135 9.24189617 0  
 C 7.383 9.95232568 0  
 C 7.383 11.37476284 0  
 C 6.1525 12.08519235 0  
 Cu 3.6915 10.66354426 1.5  
 Cu 6.1525 10.66354426 1.5  
 Cu 4.922 8.53067759 1.5  
 Cu 7.383 8.53067759 1.5  
 C 3.6915 9.24189617 3  
 C 2.461 9.95232568 3  
 C 2.461 11.37476284 3  
 C 1.2305 12.08519235 3  
 C 7.383 7.10902951 3

C 6.1525 7.81945901 3  
 C 6.1525 9.24189617 3  
 C 4.922 9.95232568 3  
 C 4.922 11.37476284 3  
 C 3.6915 12.08519235 3  
 C 9.844 7.10902951 3  
 C 8.6135 7.81945901 3  
 C 8.6135 9.24189617 3  
 C 7.383 9.95232568 3  
 C 7.383 11.37476284 3  
 C 6.1525 12.08519235 3  
 Cu 3.6915 10.66354426 4.5  
 Cu 6.1525 10.66354426 4.5  
 Cu 4.922 8.53067759 4.5  
 Cu 7.383 8.53067759 4.5  
 Cu -1.2305 6.39781092 4.5  
 Cu 1.2305 6.39781092 4.5  
 Cu 3.6912 6.39781092 4.5  
 Cu 6.1522 6.39781092 4.5  
 Cu 8.6132 6.39781092 4.5  
 Cu -1.2305 6.39781092 1.5  
 Cu 1.2305 6.39781092 1.5  
 Cu 3.6912 6.39781092 1.5  
 Cu 6.1522 6.39781092 1.5  
 Cu 8.6132 6.39781092 1.5

(8) *The coordinates of Model 8*

C 1.2305 0.71042951 3  
 C 0 1.42085901 3  
 C 0 2.84329617 3  
 C -1.2305 3.55372568 3  
 C -1.2305 4.97616284 3  
 C -2.461 5.68659235 3  
 C 3.6915 0.71042951 3  
 C 2.461 1.42085901 3  
 C 2.461 2.84329617 3  
 C 1.2305 3.55372568 3  
 C 1.2305 4.97616284 3  
 C 0 5.68659235 3  
 C 6.1525 0.71042951 3  
 C 4.922 1.42085901 3  
 C 4.922 2.84329617 3



C 3.6915 3.55372568 3  
Cu 0 4.26494426 4.5  
Cu 2.461 4.26494426 4.5  
Cu 1.2305 2.13207759 4.5  
Cu 3.6915 2.13207759 4.5  
Cu 6.1525 2.13207759 4.5  
Cu 4.922 4.26494426 4.5  
C -2.461 7.10902951 3  
C -3.6915 7.81945901 3  
C -3.6915 9.24189617 3  
C -4.922 9.95232568 3  
C -4.922 11.37476284 3  
C -6.1525 12.08519235 3  
C 0 7.10902951 3  
C -1.2305 7.81945901 3  
C -1.2305 9.24189617 3  
C -2.461 9.95232568 3  
C -2.461 11.37476284 3  
C -3.6915 12.08519235 3  
C 1.2305 7.81945901 3  
C 1.2305 9.24189617 3  
C 0 9.95232568 3  
C 0 11.37476284 3  
C -1.2305 12.08519235 3  
Cu -3.6915 10.66354426 4.5  
Cu -1.2305 10.66354426 4.5  
Cu -2.461 8.53067759 4.5  
Cu 0 8.53067759 4.5  
Cu 2.461 8.53067759 4.5  
Cu 1.2305 10.66354426 4.5  
C 8.6135 0.71042951 3  
C 7.383 1.42085901 3  
C 7.383 2.84329617 3  
C 6.1525 3.55372568 3  
C 6.1525 4.97616284 3  
C 11.0745 0.71042951 3  
C 9.844 1.42085901 3  
C 9.844 2.84329617 3  
C 8.6135 3.55372568 3  
C 8.6135 4.97616284 3  
C 7.383 5.68659235 3

C 13.5355 0.71042951 3  
 C 12.305 1.42085901 3  
 C 12.305 2.84329617 3  
 C 11.0745 3.55372568 3  
 C 11.0745 4.97616284 3  
 C 9.844 5.68659235 3  
 Cu 7.383 4.26494426 4.5  
 Cu 9.844 4.26494426 4.5  
 Cu 8.6135 2.13207759 4.5  
 Cu 11.0745 2.13207759 4.5  
 C 3.6915 9.24189617 3  
 C 2.461 9.95232568 3  
 C 2.461 11.37476284 3  
 C 1.2305 12.08519235 3  
 C 7.383 7.10902951 3  
 C 6.1525 7.81945901 3  
 C 6.1525 9.24189617 3  
 C 4.922 9.95232568 3  
 C 4.922 11.37476284 3  
 C 3.6915 12.08519235 3  
 C 9.844 7.10902951 3  
 C 8.6135 7.81945901 3  
 C 8.6135 9.24189617 3  
 C 7.383 9.95232568 3  
 C 7.383 11.37476284 3  
 C 6.1525 12.08519235 3  
 Cu 3.6915 10.66354426 4.5  
 Cu 6.1525 10.66354426 4.5  
 Cu 4.922 8.53067759 4.5  
 Cu 7.383 8.53067759 4.5  
 Cu -1.2305 6.39781092 4.5  
 Cu 1.2305 6.39781092 4.5  
 Cu 3.6912 6.39781092 4.5  
 Cu 6.1522 6.39781092 4.5  
 Cu 8.6132 6.39781092 4.5  
 C 1.2305 0.71042951 6  
 C 0 1.42085901 6  
 C 0 2.84329617 6  
 C -1.2305 3.55372568 6  
 C -1.2305 4.97616284 6  
 C -2.461 5.68659235 6

C 3.6915 0.71042951 6  
C 2.461 1.42085901 6  
C 2.461 2.84329617 6  
C 1.2305 3.55372568 6  
C 1.2305 4.97616284 6  
C 0 5.68659235 6  
C 6.1525 0.71042951 6  
C 4.922 1.42085901 6  
C 4.922 2.84329617 6  
C 3.6915 3.55372568 6  
Cu 0 4.26494426 7.5  
Cu 2.461 4.26494426 7.5  
Cu 1.2305 2.13207759 7.5  
Cu 3.6915 2.13207759 7.5  
Cu 6.1525 2.13207759 7.5  
Cu 4.922 4.26494426 7.5  
C -2.461 7.10902951 6  
C -3.6915 7.81945901 6  
C -3.6915 9.24189617 6  
C -4.922 9.95232568 6  
C -4.922 11.37476284 6  
C -6.1525 12.08519235 6  
C 0 7.10902951 6  
C -1.2305 7.81945901 6  
C -1.2305 9.24189617 6  
C -2.461 9.95232568 6  
C -2.461 11.37476284 6  
C -3.6915 12.08519235 6  
C 1.2305 7.81945901 6  
C 1.2305 9.24189617 6  
C 0 9.95232568 6  
C 0 11.37476284 6  
C -1.2305 12.08519235 6  
Cu -3.6915 10.66354426 7.5  
Cu -1.2305 10.66354426 7.5  
Cu -2.461 8.53067759 7.5  
Cu 0 8.53067759 7.5  
Cu 2.461 8.53067759 7.5  
Cu 1.2305 10.66354426 7.5  
C 8.6135 0.71042951 6  
C 7.383 1.42085901 6

C 7.383 2.84329617 6  
C 6.1525 3.55372568 6  
C 6.1525 4.97616284 6  
C 11.0745 0.71042951 6  
C 9.844 1.42085901 6  
C 9.844 2.84329617 6  
C 8.6135 3.55372568 6  
C 8.6135 4.97616284 6  
C 7.383 5.68659235 6  
C 13.5355 0.71042951 6  
C 12.305 1.42085901 6  
C 12.305 2.84329617 6  
C 11.0745 3.55372568 6  
C 11.0745 4.97616284 6  
C 9.844 5.68659235 6  
Cu 7.383 4.26494426 7.5  
Cu 9.844 4.26494426 7.5  
Cu 8.6135 2.13207759 7.5  
Cu 11.0745 2.13207759 7.5  
C 3.6915 9.24189617 6  
C 2.461 9.95232568 6  
C 2.461 11.37476284 6  
C 1.2305 12.08519235 6  
C 7.383 7.10902951 6  
C 6.1525 7.81945901 6  
C 6.1525 9.24189617 6  
C 4.922 9.95232568 6  
C 4.922 11.37476284 6  
C 3.6915 12.08519235 6  
C 9.844 7.10902951 6  
C 8.6135 7.81945901 6  
C 8.6135 9.24189617 6  
C 7.383 9.95232568 6  
C 7.383 11.37476284 6  
C 6.1525 12.08519235 6  
Cu 3.6915 10.66354426 7.5  
Cu 6.1525 10.66354426 7.5  
Cu 4.922 8.53067759 7.5  
Cu 7.383 8.53067759 7.5  
Cu -1.2305 6.39781092 7.5  
Cu 1.2305 6.39781092 7.5

Cu 3.6912 6.39781092 7.5  
Cu 6.1522 6.39781092 7.5  
Cu 8.6132 6.39781092 7.5
